# Supplementary material for: Homologous polydopamine ameliorates haemolysis of melittin for enhancing its anticancer efficacy
Source: Royal Society of Chemistry journal article supplement (doi:10.1039/d4tb00002a), 2024-01-01
Supplement: d4tb00002a1.pdf [file d4tb00002a1.pdf]

**Homologous polydopamine ameliorates haemolysis of melittin for enhancing its anticancer efficacy**

Yuhan Zheng, ‡<sup>a</sup> Qingyun Wei, ‡<sup>b</sup> Xuan Han, <sup>a</sup> Xiangmin Tao, <sup>a</sup> Tao Cao, <sup>a</sup> Tianbao Chen, <sup>c</sup> Peng Cao <sup>\*a,b,d,e</sup> and Qichen Zhan <sup>\*a</sup>

<sup>a</sup> Animal-Derived Chinese Medicine and Functional Peptides International Collaboration Joint Laboratory, School of Pharmacy, Nanjing University of Chinese Medicine, Nanjing, Jiangsu 210023, China.

<sup>b</sup> Jiangsu Provincial Medicinal Innovation Center, Affiliated Hospital of Integrated Traditional Chinese and Western Medicine, Nanjing University of Chinese Medicine, Nanjing, Jiangsu 210028, China.

<sup>c</sup> Natural Drug Discovery Group, School of Pharmacy, Queen's University Belfast, Belfast, UK.

<sup>d</sup> Shandong Academy of Chinese Medicine, Jinan 250014, China.

<sup>e</sup> The Quzhou Affiliated Hospital of Wenzhou Medical University, Quzhou Peoples Hospital, Quzhou 324000, China.

Email: cao-peng@njucm.edu.cn (P. Cao) and zhanqichen@njucm.edu.cn (Q. Zhan)

‡ These authors contributed equally to this work.

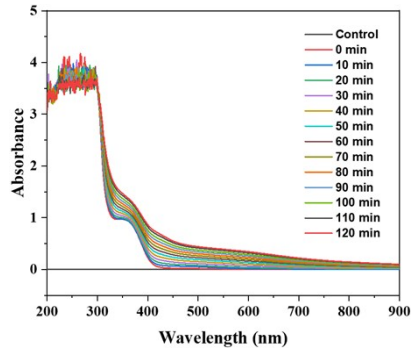

**Fig. S1** UV-vis absorbance of MPF NPs solution at different reaction time points.

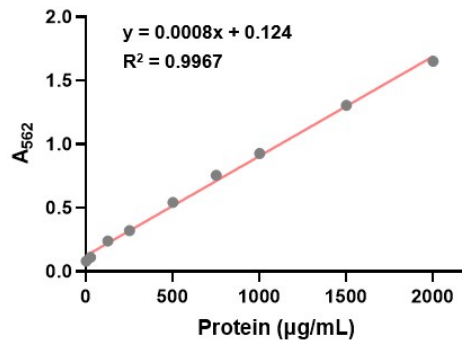

**Fig. S2** The standard curve for MEL using BCA quantitative analysis method.

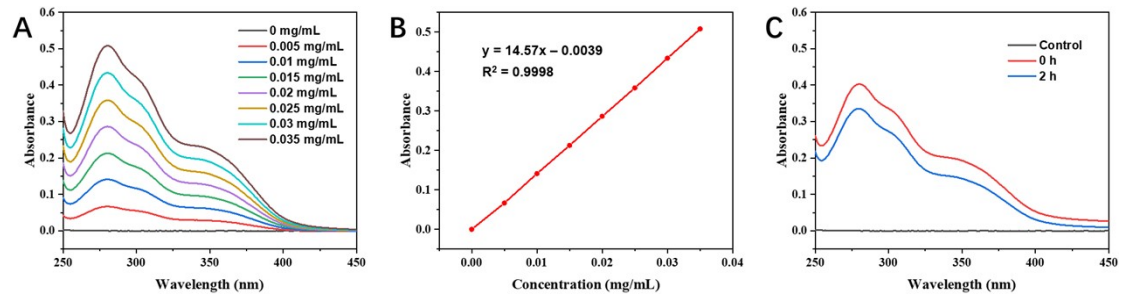

**Fig. S3** (A) UV-vis absorbance of FA at different concentrations, and (B) the corresponding concentration standard curve. (C) UV-vis absorbance changes of FA in the reaction supernatant before and after the formation of MPF NPs.

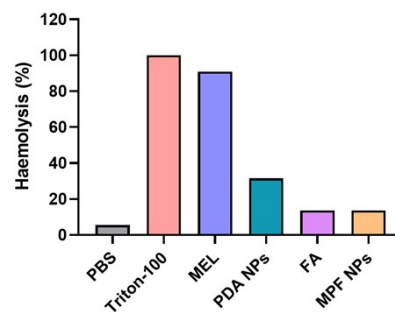

**Fig. S4** Haemolysis analysis of different drugs, positive control (Triton-100), and

negative control (PBS).

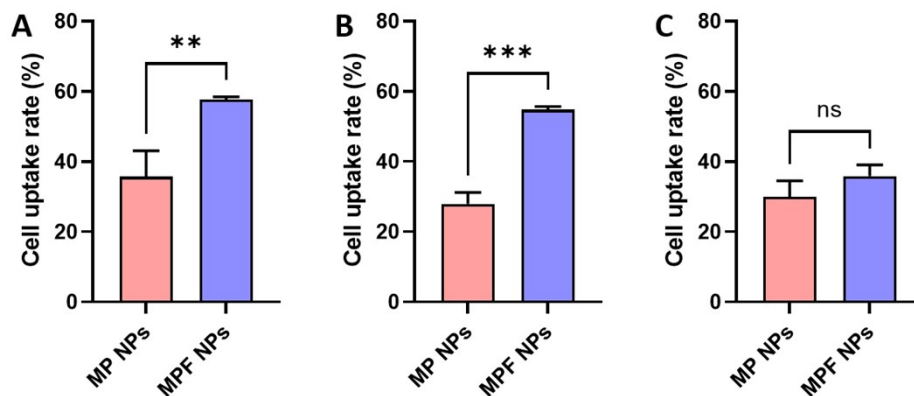

**Fig. S5** Cell uptake rate detection of MP NPs and MPF NPs in 4T1, CT26 and HepG2 cells respectively.

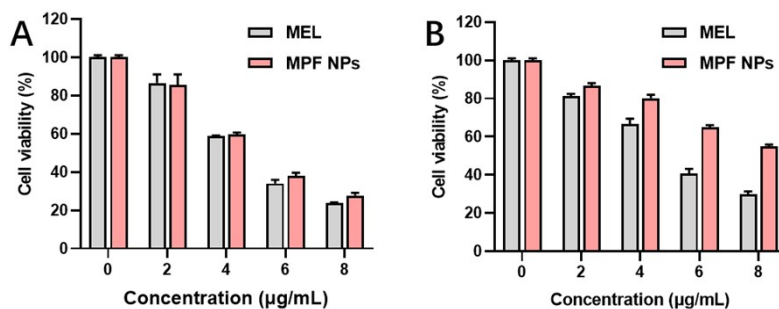

**Fig. S6** Cell viability analysis of (A) CT26 and (B) HepG2 cells after treated with MEL and MPF NPs.

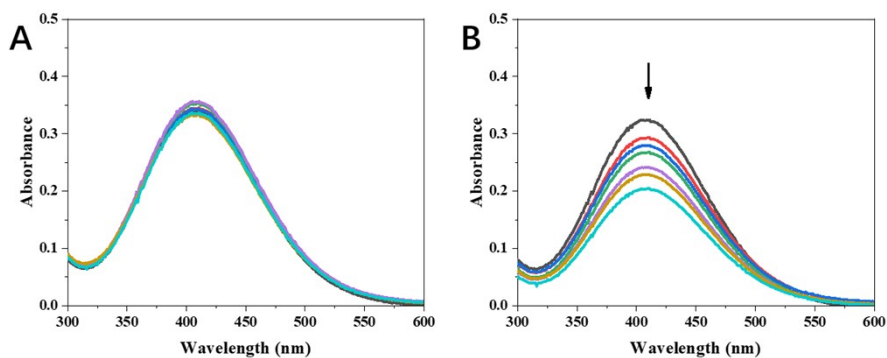

**Fig. S7** The UV-vis absorbance changes of hydrogen peroxide probe at 415 nm after treated with (A) distilled water and (B) MPF NPs.

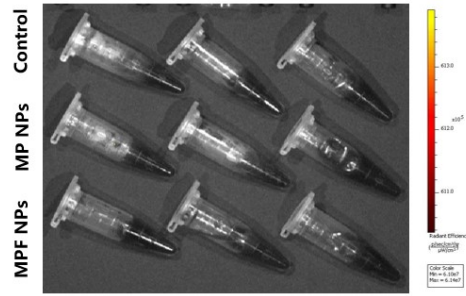

**Fig. S8** Fluorescent distribution imaging of blood obtained from 4T1-bearing mice after different drugs treatment.

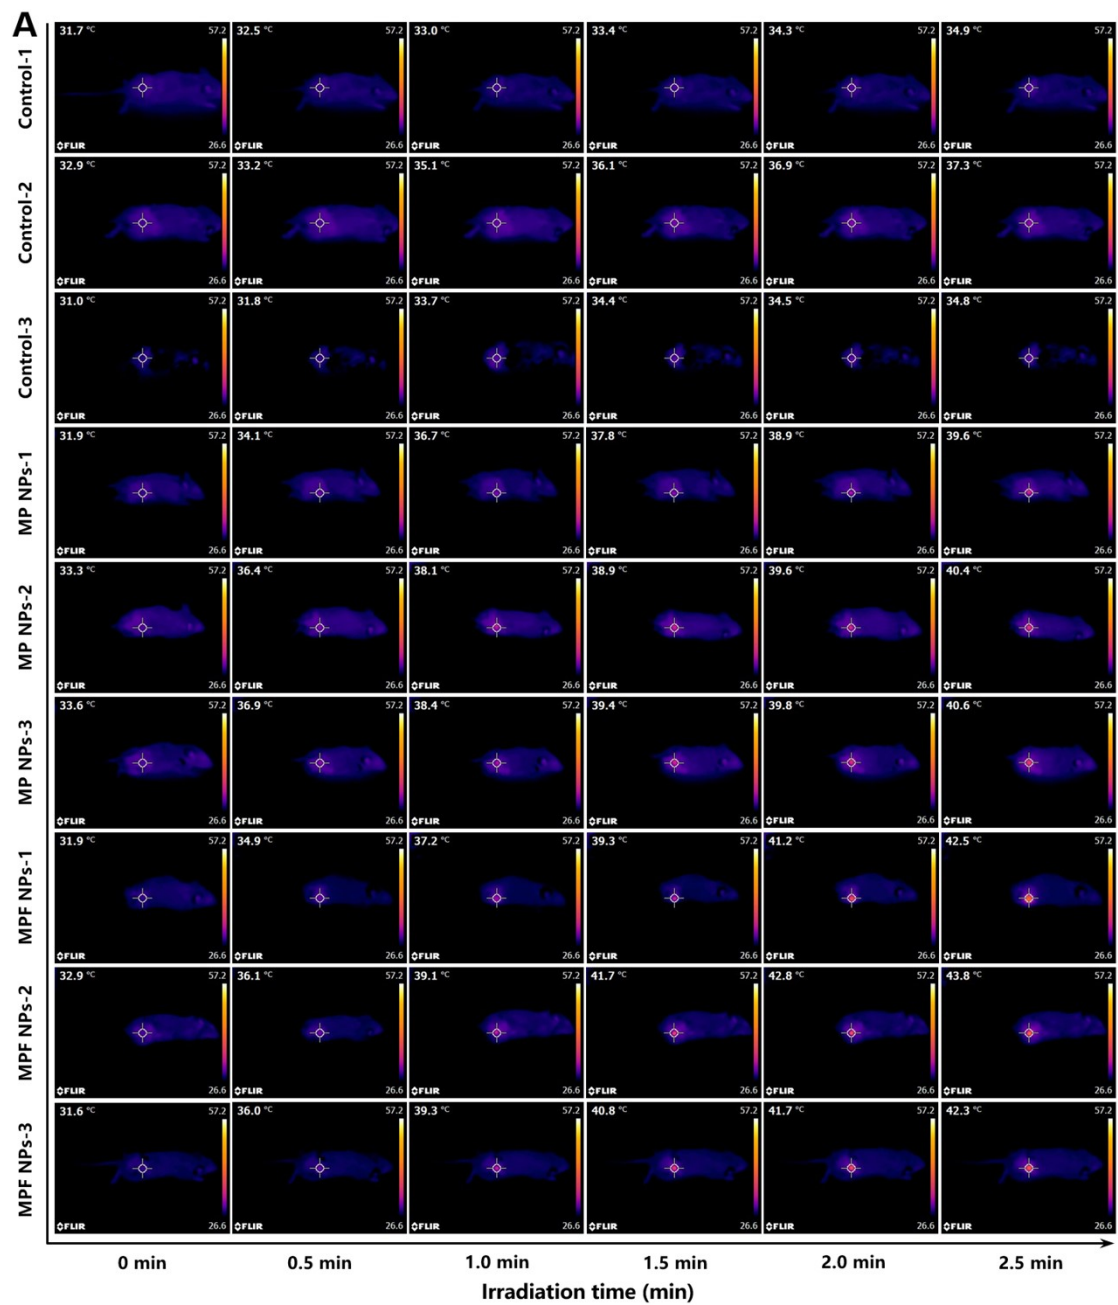

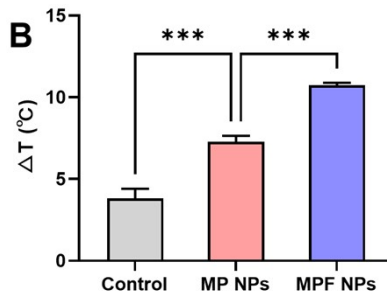

**Fig. S9** (A) Photothermal imaging of MP NPs and MPF NPs in tumour-bearing mice under laser irradiation (808 nm, 0.5 W cm<sup>-2</sup>) and (B) corresponding temperature changes comparison.

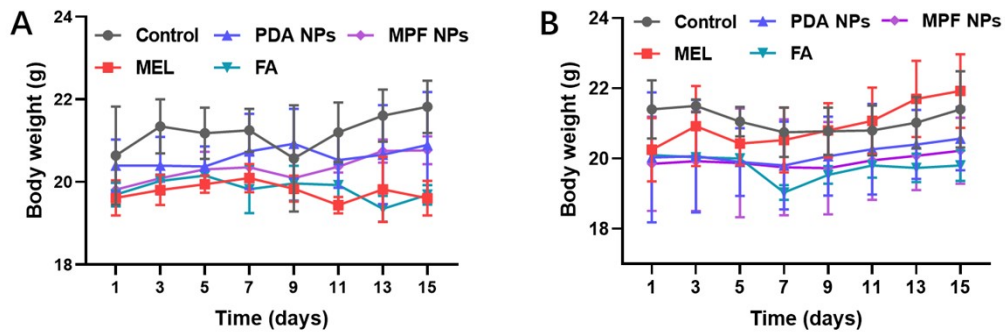

**Fig. S10** Body weight changes of (A) CT26-bearing mice and (B) HepG2-bearing mice during 14 days' treatment.
